# Supplementary material for: Identification of an Allelic Variant of the CsOr Gene Controlling Fruit Endocarp Color in Cucumber (Cucumis sativus L.) Using Genotyping-By-Sequencing (GBS) and Whole-Genome Sequencing
Source: PubMed Central journal article supplement (PMC8729256; doi:10.3389/fpls.2021.802864), 2021-12-22
Supplement: Data_Sheet_1.pdf [file Data_Sheet_1.pdf]

**Identification of an allelic variant of the *Or* gene controlling fruit endocarp color in cucumber (*Cucumis sativus* L.) using genotyping-by-sequencing (GBS) and whole-genome sequencing**

*Supplementary Material*

1 Supplementary Figures and Tables

1.1 Supplementary Figures

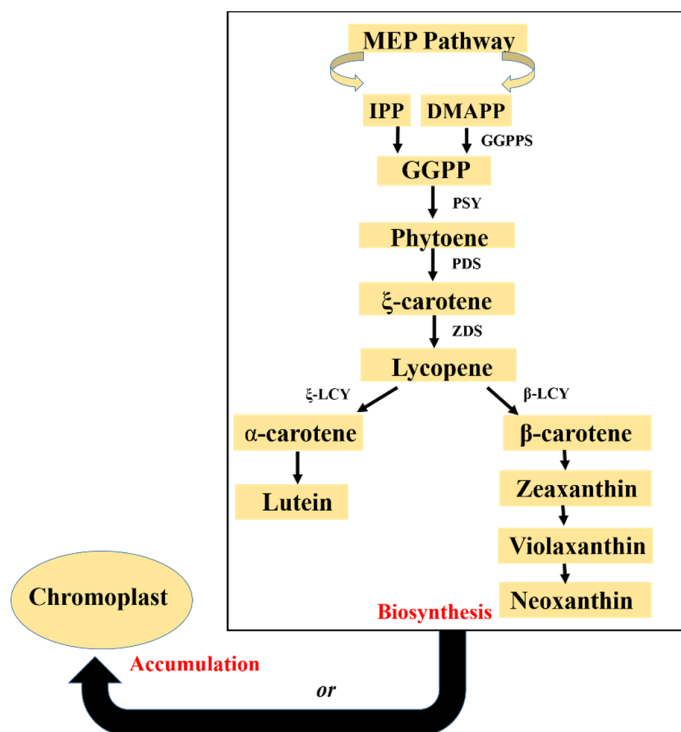

**Supplementary Figure 1.** Schematic model of carotenoid biosynthesis and accumulation pathway. Accumulation of carotenoids is determined by the rate of biosynthesis, degradation and storage capacity in a sink structure.

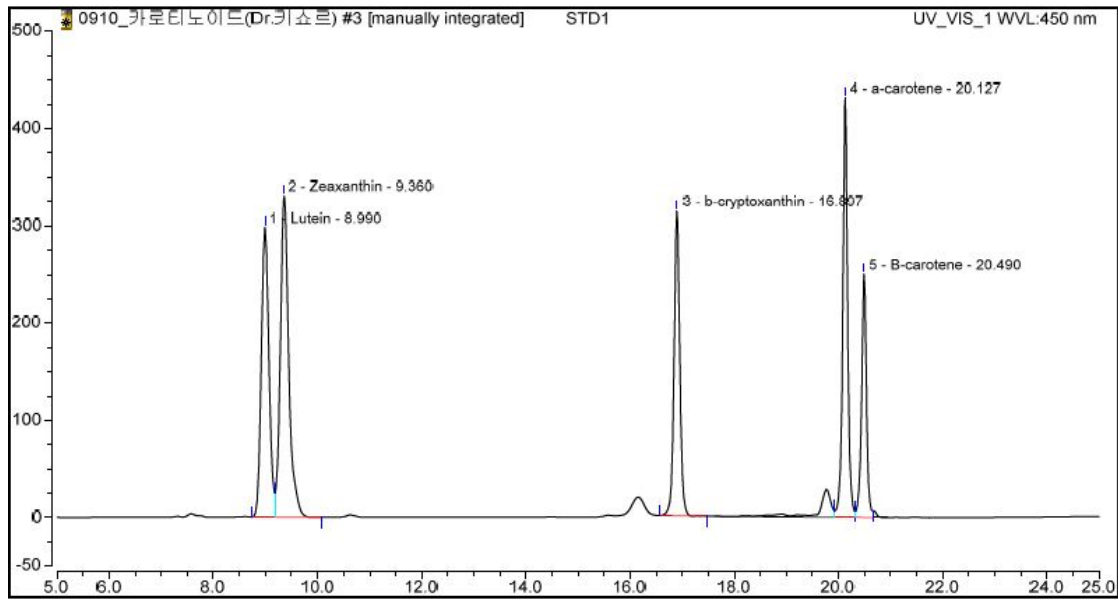

**Supplementary Figure 2.** HPLC spectrum of carotenoids for standards.

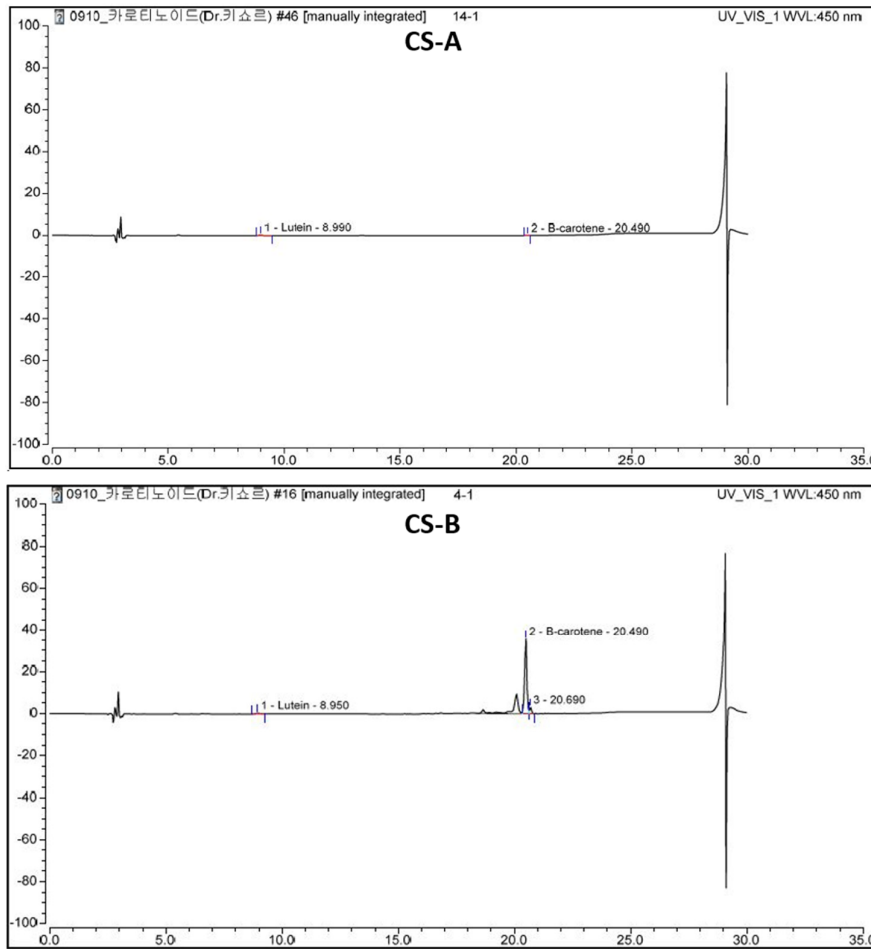

Supplementary Figure 3. HPLC spectrum of carotenoids in samples.



| Mesocarp |        | Endocarp |        | Carotenoids            |
|----------|--------|----------|--------|------------------------|
| CS-A     | CS-B   | CS-A     | CS-B   |                        |
| 0.04     | 3.04 * | 0.17     | 0.38   | Lutein                 |
| -        | 1.78 * | 0.81     | 0.97   | Zeaxanthin             |
| -        | 0.91 * | 0.81     | 1.57   | $\beta$ -Cryptoxanthin |
| 0.02     | 0.26 * | 0.23     | 4.36 * | $\alpha$ -Carotene     |
| 0.10     | 0.27   | 0.20     | 4.37 * | $\beta$ -Carotene      |

**Supplementary Figure 4.** Heatmap representation for the relative content of different carotenoids in the fruits of CS-A and CS-B inbred lines. \* indicate the level of significance ( $P < 0.05$ ).

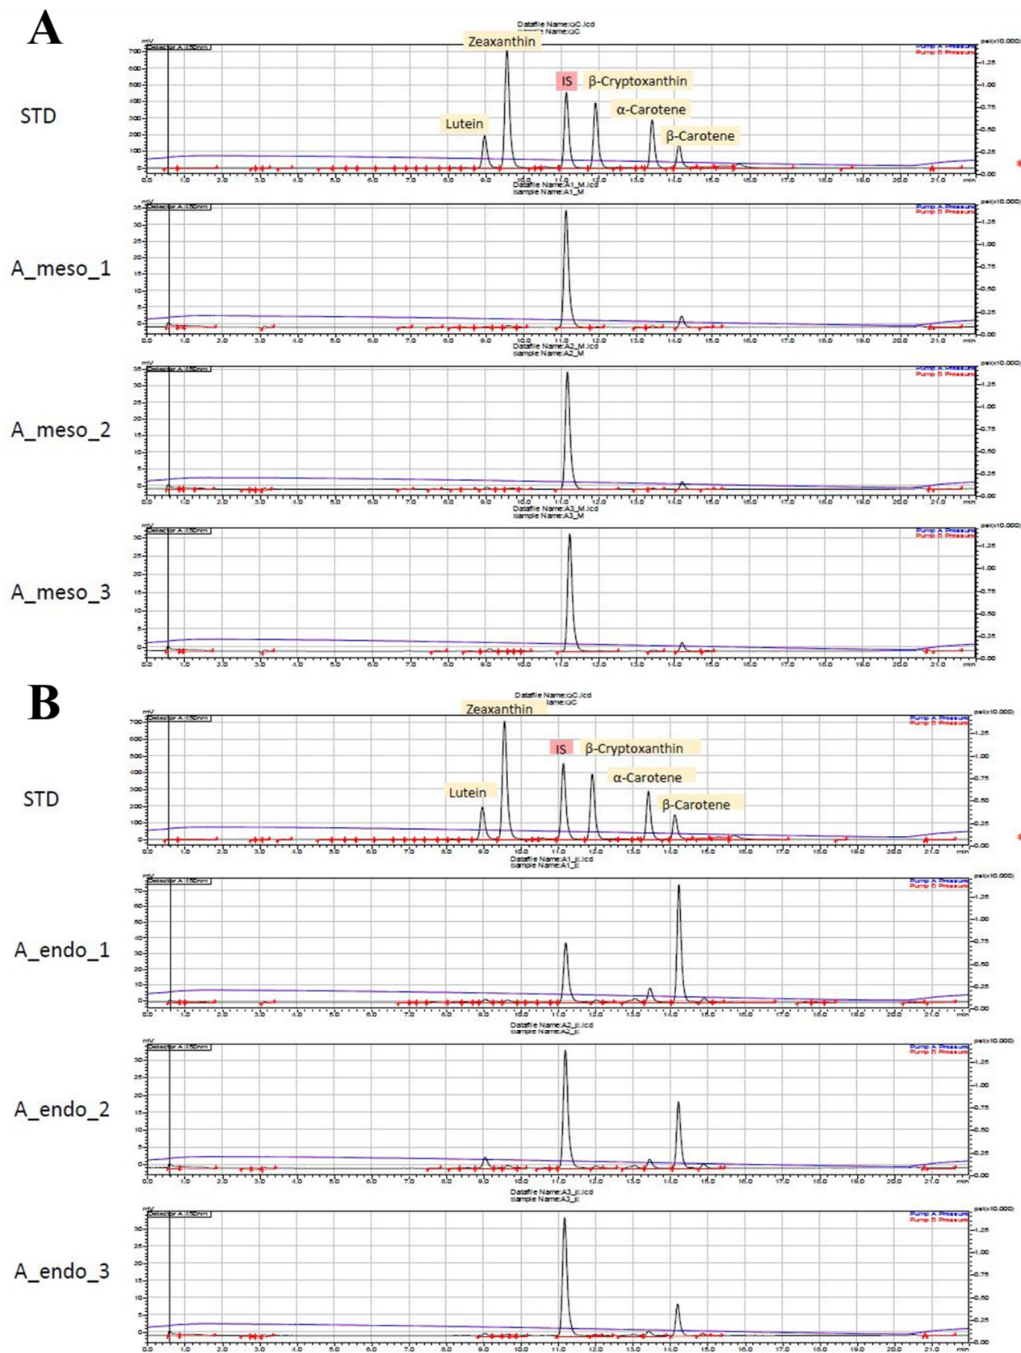

**Supplementary Figure 5.** LC-DAD spectrum of standard and CS-A. (A) Reference standard peak and peaks analogous to three mesocarp samples and reference standard peak. (B) Peaks analogous to three endocarp samples

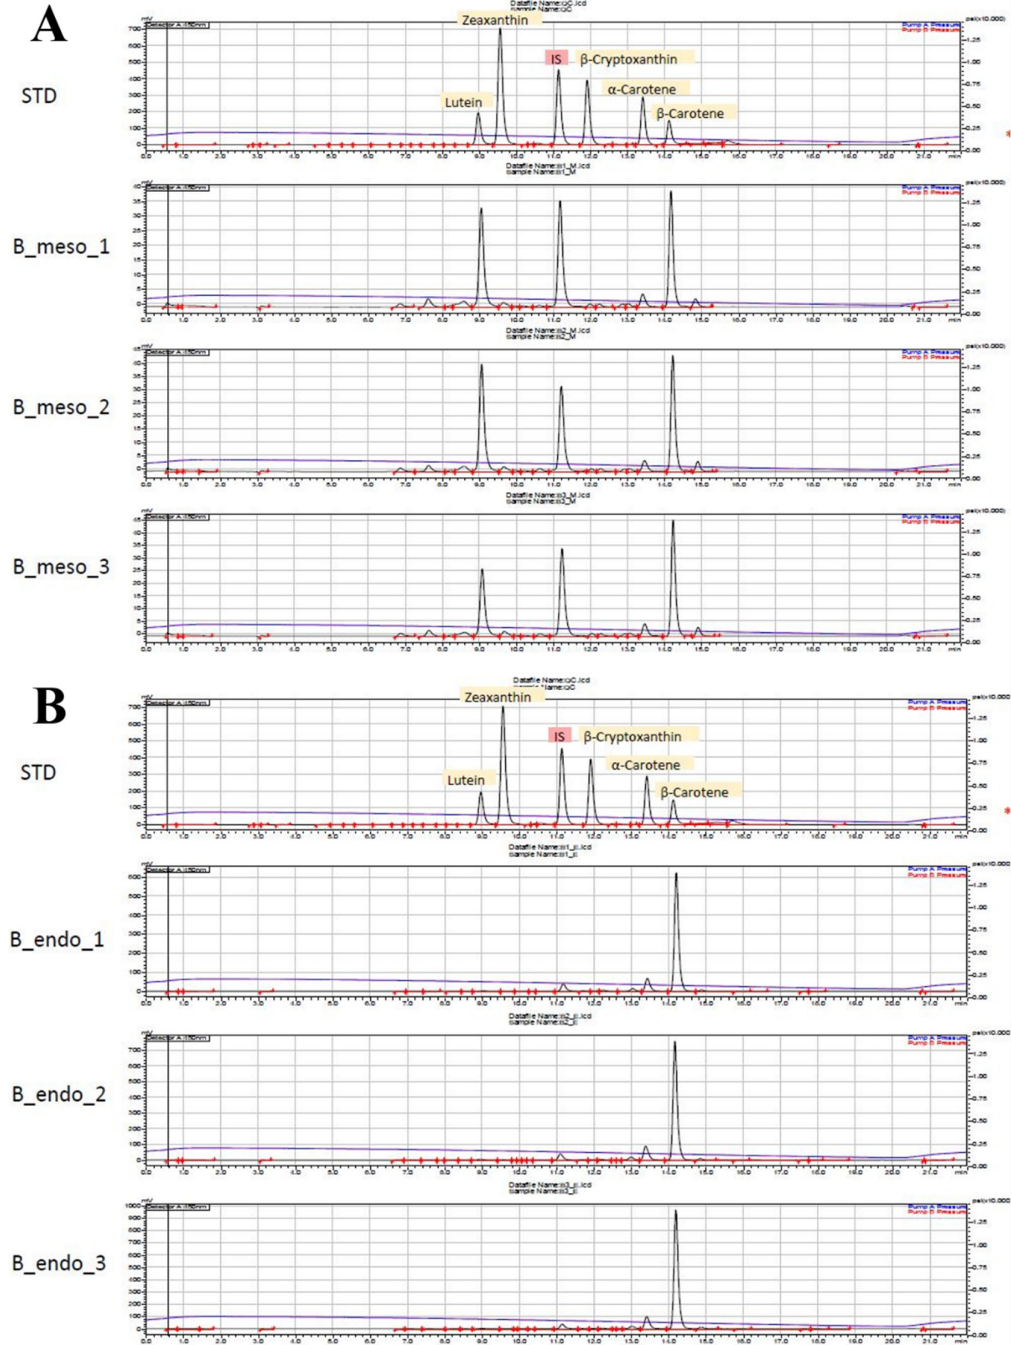

**Supplementary Figure 6.** LC-DAD spectrum of standard and CS-B. **(A)** Reference standard peak and peaks analogous to three mesocarp samples. **(B)** Reference standard peak and peaks analogous to three endocarp samples.

## 1.2 Supplementary Tables

**Supplementary Table 1.** Primers used for HRM analysis

| <b>Gene Id</b>        | <b>Position</b> | <b>Variation type</b> | <b>Primer name</b> | <b>Primer sequence (5'-3')</b>      |
|-----------------------|-----------------|-----------------------|--------------------|-------------------------------------|
| <i>CsaV3_4G000740</i> | 421,165         | SNP                   | CsaLCYB-HRM-1F     | ATACACTTCCCCCATGTTTT                |
|                       |                 |                       | CsaLCYB-HRM-1R     | AAGCTTAAGGGGTGAGGTTTG               |
|                       | 422,742         | InDel (8 bp)          | CsaLCYB-HRM-2F     | GGAGGGTCTTTTGTCTTCT                 |
|                       |                 |                       | CsaLCYB-HRM-2R     | TATAAACTAAATTATAATAACCAACTATATACATG |
| <i>CsaV3_6G040750</i> | 23,615,309      | InDel (1bp)           | CsaOR-HRM-3F       | TTCAATCAGATTATAGTGGCCT              |
|                       |                 |                       | CsaOR-HRM-3R       | TTAGTCAAATGGGTCTGAATCT              |
|                       | 23,619,716      | SNP                   | CsaOR-HRM-2F       | TCTTCGCTCCTTCCTCTC                  |
|                       |                 |                       | CsaOR-HRM-2R       | AAACTAACCTGGAAGTGTATCACT            |
|                       | 23,619,823      | SNP                   | CsaOR-HRM1F        | CATTAGCCCTATCCCCTTCT                |
|                       |                 |                       | CsaOR-HRM1R        | CTATAATCGATGGACAAGAAAATTG           |
|                       | 23,619,827      | SNP                   | CsaOR-HRM1F        | CATTAGCCCTATCCCCTTCT                |
|                       |                 |                       | CsaOR-HRM1R        | CTATAATCGATGGACAAGAAAATTG           |

**Supplementary Table 2.** Primers used for Real-time PCR

| Gene id        | Given name   | Primer name        | Sequence (5'-3')          |
|----------------|--------------|--------------------|---------------------------|
| CsaV3_6G040750 | <i>Or</i>    | Csa6G040750-qPCR-F | GATGTTCTTCCAGTGGCGTC      |
|                |              | Csa6G040750-qPCR-R | GTGCTCACTTGCCATCAACA      |
| Csa_6G484600   | <i>Actin</i> | CsActin2-qPCR-F    | ATTCTTGCATCTCTAAGTACCTTCC |
|                |              | CsActin2-qPCR-R    | CCAACTAAAGGGAAATAACTCACC  |

**Supplementary Table 3.** Summary of linkage map generated using 160 SNPs

| Linkage group | Chromosome | Number of SNPs |
|---------------|------------|----------------|
| 1             | 7          | 1              |
| 2             | 7          | 10             |
| 3             | 6          | 3              |
| 4             | 5          | 24             |
| 5             | 4          | 1              |
| 6             | 4          | 3              |
| 7             | 4          | 13             |
| 8             | 4          | 1              |
| 9             | 3          | 1              |
| 10            | 3          | 3              |
| 11            | 3          | 4              |
| 12            | 3          | 26             |
| 13            | 2          | 1              |
| 14            | 2          | 1              |
| 15            | 2          | 21             |
| 16            | 1          | 3              |
| 17            | 1          | 9              |
| 18            | 1          | 4              |
| 19            | 6          | 31             |
| Total         |            | 160            |



**Supplementary Table 4.** Distribution pattern of SNPs in CS-A and CS-B relative to the 'Chinese Long v3' reference genome

| <b>Chromosome</b> | <b>CS-A</b> | <b>CS-B</b> |
|-------------------|-------------|-------------|
| 1                 | 55,374      | 105,579     |
| 2                 | 42,025      | 140,973     |
| 3                 | 90,534      | 207,020     |
| 4                 | 38,066      | 135,405     |
| 5                 | 43,237      | 94,076      |
| 6                 | 60,402      | 173,006     |
| 7                 | 38,654      | 92,895      |
| Others            | 2,285       | 2,861       |
| Total             | 370,577     | 951,815     |
